# Supplementary material for: Long-chain noncoding ribonucleic acids affect the survival and prognosis of patients with esophageal adenocarcinoma through the autophagy pathway: construction of a prognostic model
Source: PubMed Central journal article supplement — Anticancer Drugs. 2021 Jul 30;33(1):e590–603. doi: 10.1097/CAD.0000000000001189 (PMC8670349; doi:10.1097/cad.0000000000001189), 2021-07-30

## Supplemental Digital Content

Supplement Figure 1. (A-B) Data screening condition setting and FDR correction processing.

A.

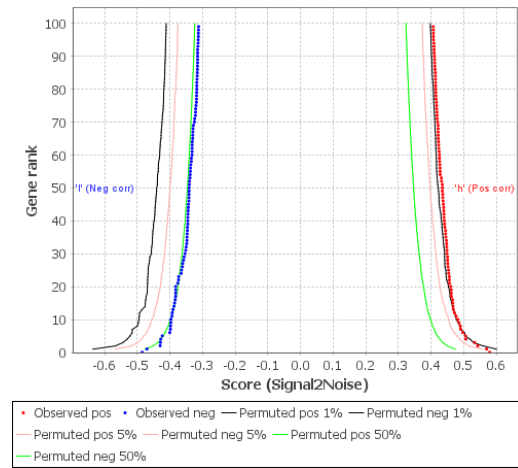

B.

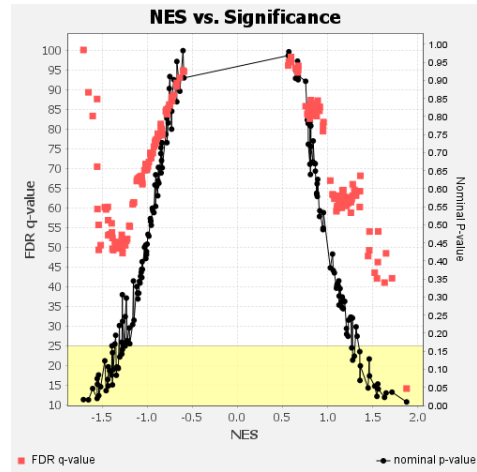

Supplement: acd-33-e590-s001.pdf [file acd-33-e590-s001.pdf]
